# Supplementary material for: Grassmann Extrapolation of Density Matrices for Born–Oppenheimer Molecular Dynamics
Source: PubMed Central journal article supplement (PMC8582259; doi:10.1021/acs.jctc.1c00751), 2021-10-08
Supplement: ct1c00751_si_001.pdf [file ct1c00751_si_001.pdf]

# Grassmann extrapolation of density matrices for Born-Oppenheimer molecular dynamics

Supplementary information

Étienne Polack

Geneviève Dusson

Benjamin Stamm

Filippo Lipparini

September 17, 2021

## Supplementary figure

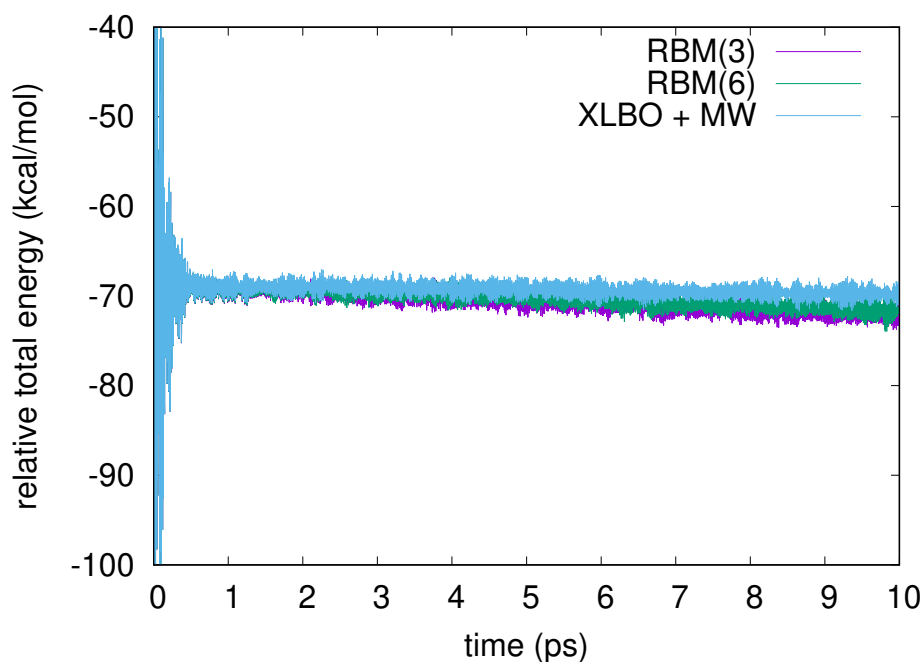

Figure 1: Total energy (kcal/mol) as a function of simulation time (fs) for 3HF comparing G-Ext(3), G-Ext(6) and XLBO with McWeeny purification, using a convergence threshold for the SCF algorithm of  $10^{-6}$ . The total energy was shifted of +505 000 kcal/mol for readability.

## Grassmann Exponential and Logarithm maps

The Grassmann manifold is a differential manifold and, for any given  $D_0 = C_0 C_0^\top \in \mathcal{G}r(N, \mathcal{N})$  with  $D_0 := D_{R_0}$  and  $C_0 := C_{R_0}$  for fixed  $R_0$ , the tangent space is characterized by

$$\mathcal{T}_{D_0} = \left\{ \Gamma \in \mathbb{R}^{\mathcal{N} \times \mathcal{N}} \mid C_0^\top \Gamma = 0 \right\} \subset \mathbb{R}^{\mathcal{N} \times \mathcal{N}}. \quad (1)$$

Note that the tangent space is a linear space. One can then introduce the Grassmann exponential which maps tangent vectors on  $\mathcal{T}_{D_0}$  to the manifold  $\mathcal{G}r(N, \mathcal{N})$  in a locally bijective manner around  $D_0$ . Indeed, it is not only an abstract tool from differential geometry, but it can be computed in practice involving the matrix exponential. By complementing  $C_0$  with orthonormal columns to obtain  $(C_0, C_\perp) \in O(\mathcal{N})$ , where  $O(\mathcal{N})$  denotes the group of orthogonal matrices of dimension  $\mathcal{N} \times \mathcal{N}$ , and  $\Gamma \in \mathcal{T}_{D_0}$  we have

$$\text{Exp}_{D_0}(\Gamma) = C C^\top, \quad C = (C_0, C_\perp) \exp \begin{pmatrix} 0 & -B^\top \\ B & 0 \end{pmatrix} \mathbb{1}_{\mathcal{N}, \mathcal{N}}. \quad (2)$$

Here,  $\exp$  denotes the matrix exponential function, the matrix  $B \in \mathbb{R}^{(\mathcal{N}-N) \times N}$  contains expansion coefficients of columns of  $\Gamma$  in a span of columns of  $C_\perp$  such that  $\Gamma = C_\perp B$  and  $\mathbb{1}_{\mathcal{N}, \mathcal{N}} = (\mathbb{1}_N, 0)^\top \in \mathbb{R}^{\mathcal{N} \times \mathcal{N}}$  are the first  $N$  columns of the  $\mathcal{N} \times \mathcal{N}$  identity matrix. As described in [1, 2], the Grassmann exponential can then be equivalently expressed by

$$\text{Exp}_{D_0}(\Gamma) = C C^\top, \quad C = [C_0 V_e \cos(\Sigma_e) + U_e \sin(\Sigma_e)] V_e^\top, \quad (3)$$

by means of a singular value decomposition (SVD) of the matrix  $\Gamma = U_e \Sigma_e V_e^\top$ .

The inverse function is the so-called Grassmann logarithm  $\text{Log}_{D_0}$  (see, e.g., [1, 2]) which maps any  $D = C C^\top \in \mathcal{G}r(N, \mathcal{N})$  in a neighborhood of  $D_0$  to the tangent space  $\mathcal{T}_{D_0}$  by

$$\text{Log}_{D_0}(D) = U_\ell \arctan(\Sigma_\ell) V_\ell^\top, \quad (4)$$

using the following SVD decomposition

$$U_\ell \Sigma_\ell V_\ell^\top = L \quad \text{with} \quad L = C \left( C_0^\top C \right)^{-1} - C_0. \quad (5)$$

## References

- [1] Alan. Edelman, Tomás A. Arias, and Steven T. Smith. The Geometry of Algorithms with Orthogonality Constraints. *SIAM J. Matrix Anal. Appl.*, 20(2):303–353, 1998-01-01.
- [2] Ralf Zimmermann. Manifold interpolation and model reduction, 2019. <http://arxiv.org/abs/1902.06502>.
